# Supplementary material
Source: Research Square preprint supplement (doi:10.21203/rs.3.rs-8959646/v1)
Supplement: Supplementary file 1 [file 34e8442b37f5dbd5d747b030.docx]

# Additional supporting file 1: Randomized Comparison of Health Examination Nonparticipation and Questionnaire Nonresponse in the Healthy Finland Survey

Tommi Härkänen *,a, Tuija Jääskeläinen a, Suvi Parikka a, Tarja Palosaari a, Annamari Lundqvist a

a Finnish Institute for Health and Welfare, Helsinki, Finland.

* Corresponding author.

## Participation rates in different groups (D1 and D2)

The overall age and sex adjusted participation rate for the questionnaire were 15 percentage points (%pt) higher in the HES sample (58.6 %) than in the QS-only sample (43.7 %). Furthermore, the crude difference between the QS-only questionnaire participation rate (44.1%) and the HES health examination or questionnaire participation rate (67.6%) was as large as 23.5 %pt (Supplementary Table 1).

In the HES, the crude participation rate was higher for the health examination (67.6%) than for the questionnaire (55.8%) (Supplementary Table 1). The difference between the QS-only and HES participation was largest among participants aged 25-44 years (about 30 %pt). Adjusted differences between marital status categories decreased as unmarried individuals were on average younger. Adjustment had smaller effect among the non-Finnish and non-Swedish speaking people, increasing participation by 4.4 %pt. Also in the HES, the adjustment increased the difference between low and high education. Urbanicity was based on two variables, municipality level and a small-area categorization. The small-area urbanicity indicated a larger adjusted difference between the urban and sparse rural areas (3.8 %pt) than the municipality-level urbanicity (1.6 %pt). The adjustment increased participation rates across occupational groups, most notably among craft and related trades workers (+9.3 %pt) , except for the unknown group (primarily retired older people), where participation decreased by 4.9 %pt. Similar result were observed by socioeconomic status: adjustment increased participation rate among students from 58% to 73%, aligning with the working group (71.9%), whereas participation among pensioners decreased from 73.7% to 59.3%. Individuals with a recent mental health hospitalization (0.58 years before the sampling date), had a lower adjusted participation rate (57.0%) than those without such events (69.2 %, modelled as 27 years before the sampling date). Other health events prior the sampling date showed weaker associations; for hospitalization due to any cause, the figures were 68.8% and 64.8%, respectively.

Supplementary Table 1 Crude and (age and sex) adjusted participation rates (%) for the questionnaire in the QS sample and for the health examination in the HES sample. The number of sample members (n) in the questionnaire and health examination surveys are presented.

|  |  |  |  | QS | | |  | HES | | |
| --- | --- | --- | --- | --- | --- | --- | --- | --- | --- | --- |
|  |  |  |  | Questionnaire participation (%) | | |  | Health examination or questionnaire participation (%) | | |
|  |  |  |  | **n** | **Crude** | **Adj** |  | **n** | **Crude** | **Adj** |
| (Intercept) |  |  |  | 61,600 | 45.7 |  |  | 9,973 | 67.6 |  |
| Age | 20-24 |  |  | 3,256 | 26.1 | 26.4 |  | 693 | 49.4 | 49.5 |
|  | 25-34 |  |  | 7,580 | 28.2 | 28.4 |  | 1,590 | 57.0 | 57.1 |
|  | 35-44 |  |  | 7,945 | 31.9 | 32.2 |  | 1,560 | 63.8 | 64.1 |
|  | 45-54 |  |  | 7,692 | 37.8 | 38.0 |  | 1,459 | 66.8 | 67.0 |
|  | 55-64 |  |  | 8,857 | 51.4 | 51.6 |  | 1,665 | 73.5 | 73.6 |
|  | 65-74 |  |  | 8,670 | 63.3 | 63.3 |  | 1,635 | 81.3 | 81.2 |
|  | 75-84 |  |  | 12,992 | 61.1 | 60.8 |  | 1,014 | 77.2 | 77.1 |
|  | 85-94 |  |  | 4,329 | 38.7 | 37.7 |  | 337 | 53.4 | 51.8 |
|  | 95+ |  |  | 279 | 26.9 | 25.2 |  | 20 | 45.0 | 41.8 |
| Sex | Men |  |  | 29,625 | 41.6 | 42.1 |  | 4,871 | 63.5 | 63.6 |
|  | Women |  |  | 31,975 | 49.5 | 49.1 |  | 5,102 | 71.6 | 71.5 |
| WSC | City of Helsinki |  |  | 2,800 | 50.7 | 53.1 |  | 1,226 | 69.0 |  |
|  | East Uusimaa |  |  | 2,800 | 43.6 | 43.1 |  | 175 | 65.7 |  |
|  | Central Uusimaa |  |  | 2,800 | 45.0 | 45.3 |  |  |  |  |
|  | West Uusimaa |  |  | 2,800 | 47.8 | 49.0 |  | 865 | 66.6 |  |
|  | Vantaa and Kerava |  |  | 2,800 | 44.2 | 46.3 |  | 425 | 60.9 |  |
|  | Southwest Finland |  |  | 2,800 | 47.7 | 47.8 |  | 921 | 64.6 |  |
|  | Satakunta |  |  | 2,800 | 44.9 | 44.2 |  | 364 | 67.3 |  |
|  | Kanta-Häme |  |  | 2,800 | 47.5 | 46.7 |  | 527 | 64.7 |  |
|  | Pirkanmaa |  |  | 2,800 | 50.5 | 51.6 |  | 656 | 71.5 |  |
|  | Päijät-Häme |  |  | 2,800 | 45.9 | 45.3 |  | 397 | 68.3 |  |
|  | Kymenlaakso |  |  | 2,800 | 41.7 | 40.5 |  | 271 | 67.5 |  |
|  | South Karelia |  |  | 2,800 | 49.3 | 48.5 |  | 640 | 72.3 |  |
|  | South Savo |  |  | 2,800 | 45.3 | 43.7 |  |  |  |  |
|  | North Savo |  |  | 2,800 | 48.5 | 48.3 |  | 476 | 70.4 |  |
|  | North Karelia |  |  | 2,800 | 46.1 | 45.6 |  | 542 | 69.9 |  |
|  | Central Finland |  |  | 2,800 | 47.5 | 47.7 |  | 496 | 66.5 |  |
|  | South Ostrobothnia |  |  | 2,800 | 40.7 | 40.0 |  | 396 | 63.4 |  |
|  | Ostrobothnia |  |  | 2,800 | 41.0 | 42.2 |  | 313 | 64.2 |  |
|  | Central Ostrobothnia |  |  | 2,800 | 42.9 | 43.0 |  | 143 | 61.5 |  |
|  | North Ostrobothnia |  |  | 2,800 | 47.5 | 48.4 |  | 865 | 70.5 |  |
|  | Kainuu |  |  | 2,800 | 43.8 | 42.5 |  |  |  |  |
|  | Lapland |  |  | 2,800 | 43.6 | 42.8 |  | 275 | 68.4 |  |
| Marriage | Not married |  |  | 33,566 | 39.2 | 41.3 |  |  |  |  |
|  | Married |  |  | 28,034 | 53.5 | 50.8 |  |  |  |  |
| Marital | Married |  |  |  |  |  |  | 4,365 | 75.3 | 72.6 |
| status | Unmarried |  |  |  |  |  |  | 3,411 | 59.4 | 64.9 |
|  | Divorced |  |  |  |  |  |  | 1,341 | 66.7 | 61.9 |
|  | Widowed |  |  |  |  |  |  | 647 | 70.9 | 69.5 |
| Language | fi |  |  | 55,454 | 46.8 | 46.4 |  | 8,855 | 69.4 | 69.1 |
|  | sv |  |  | 3,504 | 45.5 | 45.1 |  | 475 | 66.7 | 67.3 |
|  | other |  |  | 2,642 | 23.8 | 30.9 |  | 643 | 44.6 | 49.0 |
| Education | low |  |  | 15,919 | 38.7 | 33.4 |  | 2,092 | 54.2 | 51.3 |
|  | middle |  |  | 26,184 | 41.4 | 43.9 |  | 4,441 | 64.9 | 66.5 |
|  | high |  |  | 19,497 | 57.2 | 58.5 |  | 3,440 | 79.3 | 78.8 |
| Socio-economic | Working |  |  |  |  |  |  | 5,204 | 67.6 | 71.9 |
| status | Other or unknown |  |  |  |  |  |  | 1,039 | 54.3 | 61.1 |
|  | Pensioners |  |  |  |  |  |  | 3,170 | 73.7 | 59.3 |
|  | Students |  |  |  |  |  |  | 560 | 58.0 | 73.0 |
| Urban-rural | Urban |  |  | 41,160 | 46.0 | 47.0 |  | 7,061 | 67.2 | 68.2 |
| (municipality) | Dense rural |  |  | 9,810 | 43.8 | 42.6 |  | 1,318 | 67.9 | 65.8 |
|  | Sparse rural |  |  | 10,630 | 46.3 | 43.8 |  | 1,594 | 69.2 | 66.6 |
| Urban-rural | urban |  |  |  |  |  |  | 7,527 | 67.7 | 68.5 |
| (squares) | dense rural |  |  |  |  |  |  | 1,104 | 67.3 | 65.2 |
|  | sparse rural |  |  |  |  |  |  | 1,342 | 67.3 | 64.7 |
| Sample | QS only |  |  | 53,213 | 44.1 | 43.7 |  |  |  |  |
|  | HES |  |  | 8,387 | 55.8 | 58.6 |  | 9,973 | 67.6 |  |
| Age | 20-24 | **Sex** | Men | 1,716 | 18.8 | 23.3 |  | 351 | 42.5 | 44.6 |
|  | 20-24 |  | Women | 1,540 | 34.3 | 29.2 |  | 342 | 56.4 | 54.2 |
|  | 25-34 |  | Men | 3,919 | 21.2 | 25.2 |  | 793 | 50.8 | 52.3 |
|  | 25-34 |  | Women | 3,661 | 35.7 | 31.4 |  | 797 | 63.1 | 61.7 |
|  | 35-44 |  | Men | 4,148 | 26.8 | 28.7 |  | 809 | 59.0 | 59.6 |
|  | 35-44 |  | Women | 3,797 | 37.5 | 35.3 |  | 751 | 69.1 | 68.4 |
|  | 45-54 |  | Men | 3,920 | 32.3 | 34.3 |  | 740 | 61.5 | 62.6 |
|  | 45-54 |  | Women | 3,772 | 43.4 | 41.4 |  | 719 | 72.3 | 71.1 |
|  | 55-64 |  | Men | 4,466 | 46.6 | 47.6 |  | 824 | 68.4 | 69.7 |
|  | 55-64 |  | Women | 4,391 | 56.3 | 55.2 |  | 841 | 78.5 | 77.2 |
|  | 65-74 |  | Men | 4,099 | 60.1 | 59.6 |  | 765 | 80.4 | 78.2 |
|  | 65-74 |  | Women | 4,571 | 66.2 | 66.7 |  | 870 | 82.2 | 84.1 |
|  | 75-84 |  | Men | 5,818 | 61.9 | 57.1 |  | 478 | 77.0 | 73.6 |
|  | 75-84 |  | Women | 7,174 | 60.4 | 64.3 |  | 536 | 77.4 | 80.4 |
|  | 85-94 |  | Men | 1,486 | 42.9 | 34.0 |  | 108 | 56.5 | 46.9 |
|  | 85-94 |  | Women | 2,843 | 36.5 | 41.1 |  | 229 | 52.0 | 56.5 |
|  | 95+ |  | Men | 53 | 30.2 | 22.2 |  | 3 | 33.3 | 37.0 |
|  | 95+ |  | Women | 226 | 26.1 | 28.0 |  | 17 | 47.1 | 46.4 |
| Sex | Men | **Marriage** | Not married | 15,288 | 31.8 | 37.4 |  | 2,686 | 54.8 |  |
|  | Men |  | Married | 14,337 | 52.1 | 46.8 |  | 2,185 | 74.1 |  |
|  | Women |  | Not married | 18,278 | 45.4 | 44.9 |  | 2,919 | 68.1 |  |
|  | Women |  | Married | 13,697 | 55.0 | 54.5 |  | 2,183 | 76.3 |  |
| Age | 20-24 | **Sample** | QS only | 2,636 | 23.0 | 23.7 |  |  |  |  |
|  | 20-24 |  | HES | 620 | 39.2 | 37.6 |  | 693 | 49.4 |  |
|  | 25-34 |  | QS only | 6,189 | 24.4 | 25.8 |  |  |  |  |
|  | 25-34 |  | HES | 1,391 | 45.1 | 40.2 |  | 1,590 | 57.0 |  |
|  | 35-44 |  | QS only | 6,626 | 28.1 | 29.6 |  |  |  |  |
|  | 35-44 |  | HES | 1,319 | 50.9 | 44.9 |  | 1,560 | 63.8 |  |
|  | 45-54 |  | QS only | 6,521 | 34.6 | 35.5 |  |  |  |  |
|  | 45-54 |  | HES | 1,171 | 55.2 | 51.6 |  | 1,459 | 66.8 |  |
|  | 55-64 |  | QS only | 7,530 | 49.3 | 49.2 |  |  |  |  |
|  | 55-64 |  | HES | 1,327 | 63.5 | 65.2 |  | 1,665 | 73.5 |  |
|  | 65-74 |  | QS only | 7,415 | 62.2 | 61.2 |  |  |  |  |
|  | 65-74 |  | HES | 1,255 | 70.4 | 75.4 |  | 1,635 | 81.3 |  |
|  | 75-84 |  | QS only | 12,030 | 60.6 | 59.8 |  |  |  |  |
|  | 75-84 |  | HES | 962 | 66.6 | 74.2 |  | 1,014 | 77.2 |  |
|  | 85-94 |  | QS only | 4,007 | 38.7 | 36.5 |  |  |  |  |
|  | 85-94 |  | HES | 322 | 38.2 | 52.7 |  | 337 | 53.4 |  |
|  | 95+ |  | QS only | 259 | 26.3 | 24.2 |  |  |  |  |
|  | 95+ |  | HES | 20 | 35.0 | 38.2 |  | 20 | 45.0 |  |
| Profession | Unknown |  |  |  |  |  |  | 4,996 | 66.6 | 61.7 |
|  | Managers |  |  |  |  |  |  | 194 | 75.3 | 77.5 |
|  | Professionals |  |  |  |  |  |  | 1,121 | 78.5 | 81.0 |
|  | Technicians and associate professionals |  |  |  |  |  |  | 969 | 76.9 | 79.2 |
|  | Clerical support workers |  |  |  |  |  |  | 300 | 72.7 | 74.7 |
|  | Service and sales workers |  |  |  |  |  |  | 1,066 | 63.3 | 66.9 |
|  | Skilled agricultural, forestry and fishery workers |  |  |  |  |  |  | 103 | 76.7 | 79.2 |
|  | Craft and related trades workers |  |  |  |  |  |  | 497 | 51.7 | 61.0 |
|  | Plant and machine operators, and assemblers |  |  |  |  |  |  | 387 | 58.4 | 64.7 |
|  | Elementary occupations |  |  |  |  |  |  | 340 | 56.8 | 62.7 |
| Birth-related pre |  |  |  |  |  |  |  | 9,973 | 67.6 |  |
|  | -27 |  |  |  |  |  |  |  |  | 67.7 |
|  | -0.5852 |  |  |  |  |  |  |  |  | 67.3 |
| CVD pre |  |  |  |  |  |  |  | 9,973 | 67.6 |  |
|  | -27 |  |  |  |  |  |  |  |  | 67.7 |
|  | -25.99 |  |  |  |  |  |  |  |  | 67.7 |
|  | -0.5826 |  |  |  |  |  |  |  |  | 67.4 |
| Infections pre |  |  |  |  |  |  |  | 9,973 | 67.6 |  |
|  | -27 |  |  |  |  |  |  |  |  | 67.9 |
|  | -26.09 |  |  |  |  |  |  |  |  | 67.8 |
|  | -0.5817 |  |  |  |  |  |  |  |  | 66.4 |
| Injuries pre |  |  |  |  |  |  |  | 9,973 | 67.6 |  |
|  | -27 |  |  |  |  |  |  |  |  | 68.1 |
|  | -9.443 |  |  |  |  |  |  |  |  | 67.1 |
|  | -0.5808 |  |  |  |  |  |  |  |  | 66.6 |
| Mental pre |  |  |  |  |  |  |  | 9,973 | 67.6 |  |
|  | -27 |  |  |  |  |  |  |  |  | 69.2 |
|  | -0.5811 |  |  |  |  |  |  |  |  | 57.0 |

## Model selection in the QS dataset (D1)

Supplementary Table 2 Model selection of the first- and second-order interactions for the QS based on the BIC.

| model.name | df | BIC |
| --- | --- | --- |
| Main effects+Age*Gender+Gender*Married+Age*HES | 53 | 76324.2 |
| Main effects+Age*Gender*HES+Gender*Married | 61 | 76405.4 |
| Main effects+Age*Gender+Gender*Married | 46 | 76405.8 |
| Main effects+Age*HES | 45 | 76412.5 |
| Main effects+Age*Gender | 45 | 76431.5 |
| Main effects+Age*Gender*HES | 60 | 76431.7 |
| Main effects+Gender*Married | 39 | 76444 |
| Main effects+Education*HES | 40 | 76465.4 |
| Main effects+Age*Gender*Married | 60 | 76478.6 |
| Main effects+Married*Education | 40 | 76484.1 |
| Main effects | **38** | **76491.3** |
| Main effects+Gender*Education | 40 | 76495.4 |
| Main effects+Age*Married | 45 | 76497.2 |
| Main effects+Gender*HES | 39 | 76498.9 |
| Main effects+Urbanization*HES | 40 | 76499.9 |
| Main effects+Married*HES | 39 | 76500.8 |
| Main effects+Married*Urbanization | 40 | 76501.4 |
| Main effects+Married*Language | 40 | 76502.6 |
| Main effects+Gender*Language | 40 | 76510.1 |
| Main effects+Gender*Urbanization | 40 | 76512.2 |

## Logistic regression model for the HES dataset (D2)

The same predictors as in D1 (age, gender, stratum, married, language, education, urbanization and the HES indicator) were used, supplemented with hospitalization data categorized into five event groups: cardiovascular, mental and infectious diseases, birth events and injuries. These were operationalized as the time difference of the most recent event of that type prior to the sampling time and the sampling time, and included as continuous predictors; if an individual had not experienced such events since 1996, then the value -27 was used. The primary model was the main effects logistic regression model combined with the interaction of age and sex.

The OR estimates for participation in the HES were like those in the QS, but the confidence intervals were wider as the sample size in the HES was smaller (Supplementary Table 3). Some predictors had different categorization, and the sets of predictors were not the same. Unmarried and divorced had lower participation rates than married and widowed individuals. Individuals, who are working, have lower participation rates than students (OR=2.01), or other or unknown socioeconomic status (OR=1.41). Skilled agricultural, forestry and fishery workers had the highest participation rates compared to individuals with unknown profession (OR=3.11), other groups were professionals (OR=2.23), and technicians and associate professionals (OR=2.25). Hospitalization due to mental health reasons near the sampling date decreased the participation rates (OR=0.98).

## Model selection in the HES dataset (D2)

The nonlinearity was assessed using three parameterizations: age grouped into 5- or 10-year intervals, and a GAM model with thin plate splines for age.[43] These models were compared using the BIC. The parametric models based on different parameterizations for age were compared with the random forest[17] (node sizes 5 or 25) and classification and regression trees (CART).[44] Possible interactions and nonlinearities were assessed by comparing the predicted participation probabilities with the realized participation in a randomly chosen, 30% test set, with models trained on the remaining 70% training data.

The best parametric model for participation in the HES was the GAM model (BIC=11,790), whereas the model based on the 10-year categorized age (BIC=11,820) was considerably worse. The predictive participation match was 71.8% for the GAM model, 71.6% for the 10-year categorical age model, 71,3% for the random forest with minimum node size 25, and 70,4% for the CART and 70.0% for the random forest with minimum node size 5. Therefore, the GAM model was selected for calculating the IP weights, as the RF and CART models did not indicate improvements due to possible interactions or nonlinearities, which were not included in the parametric models.

## Models for the inverse probability weights (IPW) for the QS (D1) and HES (D2) samples

Supplementary Table 3 Fully adjusted odds ratio (OR) estimates of the participation models of the QS and HES with 95% confidence intervals.

|  |  |  |  | QS | | | QS with HES model | | | HES | | |
| --- | --- | --- | --- | --- | --- | --- | --- | --- | --- | --- | --- | --- |
|  |  |  |  | **OR** | **95% CI** | | **OR** | **95% CI** | | **OR** | **95% CI** | |
| (Intercept) |  |  |  | 0.14 | 0.12 | 0.16 | 0.09 | 0.07 | 0.11 | 0.23 | 0.14 | 0.37 |
| Age | 25-34 |  |  | 0.88 | 0.75 | 1.03 | 0.85 | 0.76 | 0.96 | 1.08 | 0.82 | 1.42 |
|  | 35-44 |  |  | 1.03 | 0.88 | 1.20 | 0.88 | 0.78 | 0.99 | 1.40 | 1.05 | 1.86 |
|  | 45-54 |  |  | 1.35 | 1.16 | 1.57 | 1.11 | 0.98 | 1.25 | 1.49 | 1.11 | 2.00 |
|  | 55-64 |  |  | 2.76 | 2.37 | 3.20 | 2.13 | 1.89 | 2.39 | 2.05 | 1.53 | 2.76 |
|  | 65-74 |  |  | 5.22 | 4.48 | 6.07 | 3.72 | 3.23 | 4.29 | 4.93 | 3.41 | 7.12 |
|  | 75-84 |  |  | 6.09 | 5.25 | 7.06 | 3.86 | 3.34 | 4.46 | 4.22 | 2.81 | 6.33 |
|  | 85-94 |  |  | 3.24 | 2.72 | 3.85 | 1.92 | 1.63 | 2.24 | 1.70 | 1.00 | 2.89 |
|  | 95+ |  |  | 2.23 | 1.20 | 4.15 | 1.24 | 0.90 | 1.70 | 0.62 | 0.05 | 7.32 |
| Sex | Women |  |  | 2.06 | 1.75 | 2.43 | 1.35 | 1.30 | 1.41 | 1.55 | 1.13 | 2.13 |
| WSC | East Uusimaa |  |  | 0.92 | 0.81 | 1.03 |  |  |  |  |  |  |
|  | Central Uusimaa | | | 1.02 | 0.91 | 1.15 |  |  |  |  |  |  |
|  | West Uusimaa |  |  | 0.97 | 0.86 | 1.09 |  |  |  |  |  |  |
|  | Vantaa and Kerava | | | 1.02 | 0.91 | 1.15 |  |  |  |  |  |  |
|  | Southwest Finland | | | 0.99 | 0.88 | 1.11 |  |  |  |  |  |  |
|  | Satakunta |  |  | 0.92 | 0.82 | 1.03 |  |  |  |  |  |  |
|  | Kanta-Häme |  |  | 0.99 | 0.89 | 1.12 |  |  |  |  |  |  |
|  | Pirkanmaa |  |  | 1.18 | 1.05 | 1.33 |  |  |  |  |  |  |
|  | Päijät-Häme |  |  | 0.99 | 0.89 | 1.12 |  |  |  |  |  |  |
|  | Kymenlaakso |  |  | 0.78 | 0.69 | 0.88 |  |  |  |  |  |  |
|  | South Karelia |  |  | 1.11 | 0.99 | 1.25 |  |  |  |  |  |  |
|  | South Savo |  |  | 0.96 | 0.86 | 1.08 |  |  |  |  |  |  |
|  | North Savo |  |  | 1.05 | 0.94 | 1.18 |  |  |  |  |  |  |
|  | North Karelia |  |  | 1.00 | 0.89 | 1.12 |  |  |  |  |  |  |
|  | Central Finland |  |  | 1.04 | 0.92 | 1.16 |  |  |  |  |  |  |
|  | South Ostrobothnia | | | 0.77 | 0.68 | 0.87 |  |  |  |  |  |  |
|  | Ostrobothnia |  |  | 0.83 | 0.73 | 0.94 |  |  |  |  |  |  |
|  | Central Ostrobothnia | | | 0.89 | 0.79 | 1.00 |  |  |  |  |  |  |
|  | North Ostrobothnia | | | 1.00 | 0.89 | 1.12 |  |  |  |  |  |  |
|  | Kainuu |  |  | 0.94 | 0.83 | 1.06 |  |  |  |  |  |  |
|  | Lapland |  |  | 0.89 | 0.79 | 1.00 |  |  |  |  |  |  |
| Urban-rural (sq) | dense rural |  |  |  |  |  | 0.94 | 0.89 | 1.00 | 0.90 | 0.75 | 1.09 |
|  | sparse rural |  |  |  |  |  | 0.98 | 0.92 | 1.05 | 0.78 | 0.63 | 0.96 |
| kuntalk | Dense rural |  |  | 0.92 | 0.87 | 0.96 | 0.91 | 0.85 | 0.96 | 0.95 | 0.80 | 1.14 |
|  | Sparse rural |  |  | 1.01 | 0.96 | 1.06 | 1.00 | 0.93 | 1.07 | 1.09 | 0.90 | 1.34 |
| Marriage | Married |  |  | 1.59 | 1.51 | 1.68 |  |  |  |  |  |  |
| Marital status | Unmarried |  |  |  |  |  | 0.69 | 0.66 | 0.72 | 0.70 | 0.62 | 0.79 |
|  | Divorced |  |  |  |  |  | 0.71 | 0.68 | 0.75 | 0.66 | 0.57 | 0.76 |
|  | Widowed |  |  |  |  |  | 0.73 | 0.69 | 0.78 | 1.00 | 0.79 | 1.26 |
| Language | Swedish |  |  | 0.98 | 0.90 | 1.07 | 0.89 | 0.83 | 0.96 | 0.84 | 0.68 | 1.04 |
|  | other |  |  | 0.51 | 0.46 | 0.56 | 0.44 | 0.39 | 0.49 | 0.48 | 0.39 | 0.59 |
| Education | middle |  |  | 1.58 | 1.51 | 1.66 | 1.61 | 1.54 | 1.69 | 1.78 | 1.57 | 2.02 |
|  | high |  |  | 2.84 | 2.70 | 2.99 | 2.70 | 2.56 | 2.85 | 2.74 | 2.36 | 3.18 |
| Socio-economic | Other or unknown | | |  |  |  | 1.16 | 0.99 | 1.35 | 1.41 | 1.02 | 1.93 |
|  | Pensioners |  |  |  |  |  | 1.30 | 1.10 | 1.53 | 1.34 | 0.94 | 1.91 |
|  | Students |  |  |  |  |  | 1.47 | 1.24 | 1.75 | 2.01 | 1.43 | 2.85 |
| Profession | Managers |  |  |  |  |  | 1.12 | 0.92 | 1.37 | 2.00 | 1.27 | 3.14 |
|  | Professionals |  |  |  |  |  | 1.44 | 1.23 | 1.68 | 2.23 | 1.60 | 3.11 |
|  | Technicians and associate professionals | | |  |  |  | 1.35 | 1.16 | 1.58 | 2.25 | 1.61 | 3.13 |
|  | Clerical support workers | | |  |  |  | 1.36 | 1.14 | 1.64 | 1.98 | 1.33 | 2.93 |
|  | Service and sales workers | |  |  |  |  | 1.21 | 1.04 | 1.41 | 1.58 | 1.15 | 2.16 |
|  | Skilled agricultural, forestry and fishery workers | | |  |  |  | 1.29 | 1.05 | 1.60 | 3.11 | 1.77 | 5.47 |
|  | Craft and related trades workers | | |  |  |  | 0.99 | 0.84 | 1.17 | 1.29 | 0.91 | 1.83 |
|  | Plant and machine operators, and assemblers | | |  |  |  | 1.03 | 0.87 | 1.22 | 1.52 | 1.06 | 2.19 |
|  | Elementary occupations | | |  |  |  | 1.15 | 0.96 | 1.38 | 1.60 | 1.11 | 2.32 |
| Sample | HES |  |  | 2.10 | 1.73 | 2.54 | 2.11 | 1.74 | 2.56 |  |  |  |
| CVD pre |  |  |  |  |  |  | 1.00 | 1.00 | 1.00 | 1.00 | 0.99 | 1.01 |
| Mental pre |  |  |  |  |  |  | 0.98 | 0.98 | 0.98 | 0.98 | 0.98 | 0.99 |
| Infections pre |  |  |  |  |  |  | 0.99 | 0.99 | 1.00 | 1.00 | 0.99 | 1.01 |
| Birth-related pre |  |  |  |  |  |  | 0.99 | 0.99 | 0.99 | 0.99 | 0.98 | 1.00 |
| Injuries pre |  |  |  |  |  |  | 1.00 | 0.99 | 1.00 | 1.00 | 0.99 | 1.00 |
| Age | 25-34 | **Sex** | Women | 0.93 | 0.77 | 1.13 |  |  |  | 1.07 | 0.73 | 1.57 |
|  | 35-44 |  | Women | 0.79 | 0.65 | 0.96 |  |  |  | 0.95 | 0.64 | 1.41 |
|  | 45-54 |  | Women | 0.78 | 0.64 | 0.94 |  |  |  | 0.91 | 0.61 | 1.34 |
|  | 55-64 |  | Women | 0.73 | 0.61 | 0.89 |  |  |  | 1.04 | 0.71 | 1.54 |
|  | 65-74 |  | Women | 0.72 | 0.59 | 0.87 |  |  |  | 0.70 | 0.47 | 1.05 |
|  | 75-84 |  | Women | 0.57 | 0.48 | 0.69 |  |  |  | 0.70 | 0.45 | 1.09 |
|  | 85-94 |  | Women | 0.49 | 0.40 | 0.61 |  |  |  | 0.63 | 0.36 | 1.12 |
|  | 95+ |  | Women | 0.46 | 0.23 | 0.92 |  |  |  | 1.29 | 0.09 | 18.10 |
| Sex | Women | **Marriage** | Married | 0.80 | 0.74 | 0.86 |  |  |  |  |  |  |
| Age | 25-34 | **Sample** | HES | 1.24 | 0.98 | 1.55 | 1.20 | 0.96 | 1.52 |  |  |  |
|  | 35-44 |  | HES | 1.34 | 1.07 | 1.68 | 1.36 | 1.08 | 1.72 |  |  |  |
|  | 45-54 |  | HES | 1.13 | 0.90 | 1.42 | 1.15 | 0.91 | 1.45 |  |  |  |
|  | 55-64 |  | HES | 0.84 | 0.67 | 1.05 | 0.87 | 0.69 | 1.09 |  |  |  |
|  | 65-74 |  | HES | 0.66 | 0.52 | 0.83 | 0.67 | 0.53 | 0.85 |  |  |  |
|  | 75-84 |  | HES | 0.60 | 0.47 | 0.76 | 0.62 | 0.48 | 0.78 |  |  |  |
|  | 85-94 |  | HES | 0.45 | 0.33 | 0.62 | 0.46 | 0.34 | 0.63 |  |  |  |
|  | 95+ |  | HES | 0.66 | 0.24 | 1.80 | 0.66 | 0.24 | 1.80 |  |  |  |


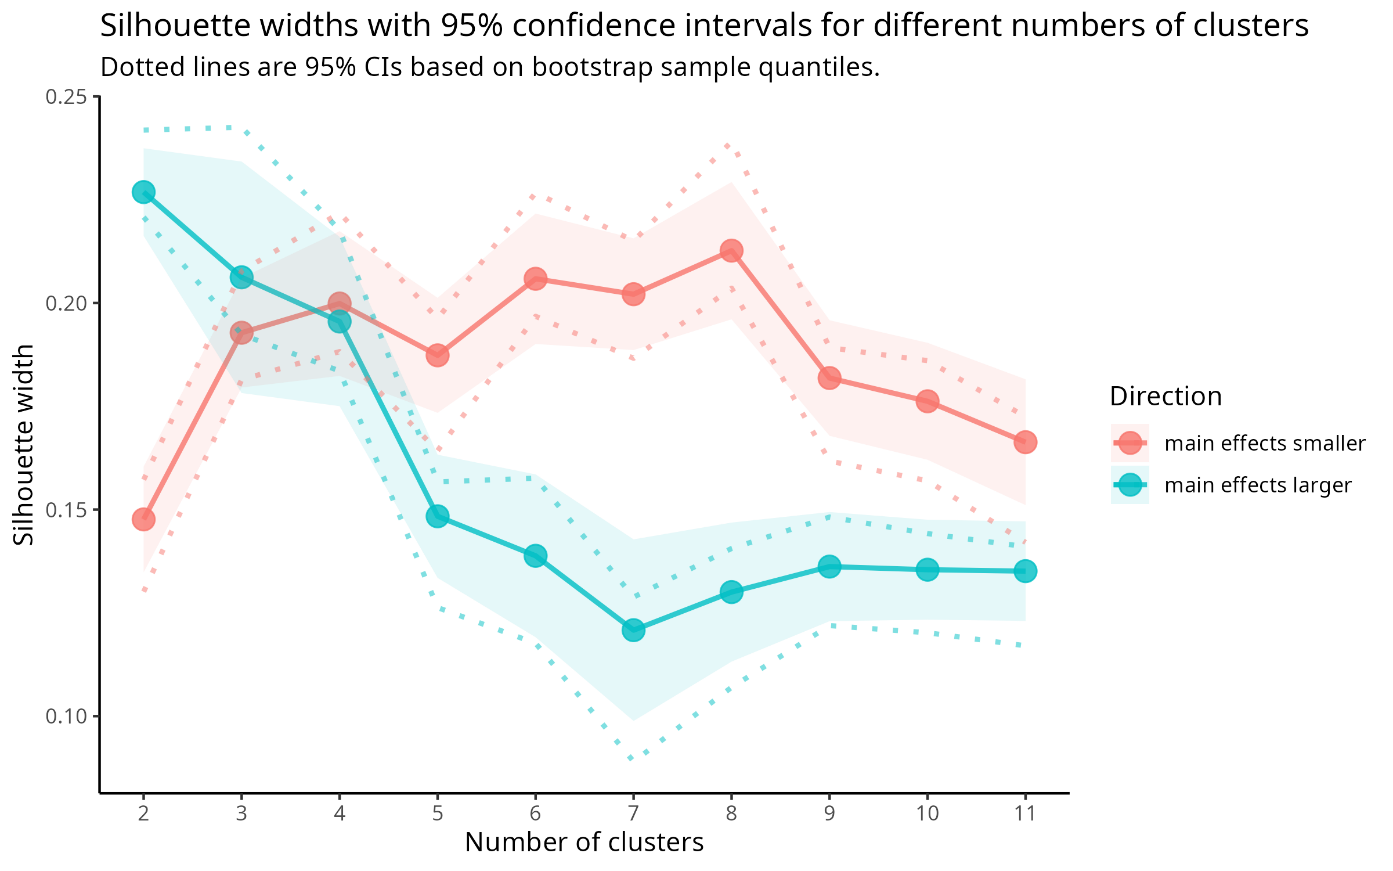


Supplementary Figure 1 Silhouette widths for different number of clusters (dots with connecting lines) with 95% confidence intervals based on subsampling bootstrap (shaded area presents symmetric and dotted lines quantile-based intervals).

Supplementary Table 4 Representative individuals (medoids) in the clustering analyses in groups where the difference of the estimated participation probabilities (RD) based on the main effects logistic regression (pr.logit) were more than 0.15 smaller than those of the random forest (pr.rf) models (panel A) or more than 0.15 higher (panel B).
Panels C and D present the corresponding medoids for the participation probability ratios (RR) based on thresholds 0.70 and 1.4. Predictors, which had the same value for all medoids within a panel are presented under the heading “Equal covariate values”, and predictors with differences between the medoids under heading “Differences …” with the size of the cluster (n).

| Participation probability differences |
| --- |
| A. Participation probabilities based on the main effects logistic regression model are smaller |
| Equal covariate values |

ts221_tt1 km_luokka_2018 kieli3 cancer_h_post_cont mental_h_post_cont infection_h_post_cont

1 QS only urban fi Inf Inf Inf

birth_h_post_cont injury_h_post_cont kieliryhma2 kuntaryhma_koodi_2022 r3

1 Inf Inf fi Urban main effects smaller

| Differences in covariate values |
| --- |

n sukupuoli ika2 ammattikoodi koul3 sose4 siviilisaaty

1 343 Mies 63 Unknown middle Pensioners Unmarried

2 180 Nainen 31 Technicians and associate professionals high Working Unmarried

3 452 Nainen 79 Unknown low Pensioners Married

4 369 Nainen 86 Unknown low Pensioners Widowed

musculoskeletal_pre_cont musculoskeletal_post_cont arthropathies_pre_cont arthropathies_post_cont

1 -4.274 0.7289300 -4.274 0.7289300

2 -Inf Inf -Inf Inf

3 -0.352 0.8422694 -2.733 0.8422694

4 -25.810 Inf -25.810 Inf

rheuma_endpoints_pre_cont rheuma_endpoints_post_cont diabetes_pre_cont diabetes_post_cont

1 -Inf 0.72893 -Inf Inf

2 -Inf Inf -Inf Inf

3 -2.733 Inf -0.093 0.1916496

4 -Inf Inf -0.181 0.1013005

cancer_h_pre_cont cvd_h_pre_cont cvd_h_post_cont mental_h_pre_cont infection_h_pre_cont

1 -Inf -5.873 Inf -Inf -Inf

2 -Inf -Inf Inf -Inf -Inf

3 -3.501 -8.274 0.4671648 -19.724 -Inf

4 -Inf -0.894 1.2877310 -Inf -7.017

birth_h_pre_cont injury_h_pre_cont ikalk hyvinvointialue_nimi_2022_fi ss2 pr.logit pr.rf

1 -Inf -6.516 55-64 Lapland WSC Married 0.320 0.597

2 -11.357 -2.042 25-34 South Ostrobothnia WSC Married 0.319 0.473

3 -Inf -1.999 75-84 Kymenlaakso WSC Not married 0.473 0.633

4 -Inf -Inf 85-94 Kymenlaakso WSC Married 0.254 0.424

rd rr rr3

1 0.277 1.865252 main effects smaller

2 0.155 1.484972 main effects smaller

3 0.160 1.337827 about the same

4 0.170 1.671352 main effects smaller

| B. Participation probabilities based on the main effects logistic regression model are larger |
| --- |
| Equal covariate values |

ts221_tt1 ammattikoodi km_luokka_2018 sose4 kieli3 birth_h_pre_cont birth_h_post_cont ikalk

1 QS only Unknown urban Pensioners fi -Inf Inf 75-84

hyvinvointialue_nimi_2022_fi kieliryhma2 kuntaryhma_koodi_2022 r3

1 Pirkanmaa WSC fi Urban main effects larger

| Differences in covariate values |
| --- |

n sukupuoli ika2 koul3 siviilisaaty musculoskeletal_pre_cont musculoskeletal_post_cont

1 852 Mies 76 high Married -2.463 0.660

2 994 Nainen 77 middle Divorced -0.067 0.012

arthropathies_pre_cont arthropathies_post_cont rheuma_endpoints_pre_cont rheuma_endpoints_post_cont

1 -2.463 0.660 -Inf Inf

2 -1.771 0.196 -1.771 0.1958039

diabetes_pre_cont diabetes_post_cont cancer_h_pre_cont cancer_h_post_cont cvd_h_pre_cont

1 -0.005 0.003 -Inf Inf -0.005

2 -0.153 0.181 -0.7 0.3731957 -1.696

cvd_h_post_cont mental_h_pre_cont mental_h_post_cont infection_h_pre_cont infection_h_post_cont

1 0.003 -Inf Inf -5.526 0.360

2 0.677 -0.067 0.01165868 -3.221 0.375

injury_h_pre_cont injury_h_post_cont ss2 pr.logit pr.rf rd rr rr3

1 -Inf 0.4648376 Not married 0.826 0.495 -0.331 0.599 main effects larger

2 -0.077 Inf Married 0.667 0.469 -0.198 0.704 about the same

| Participation probability ratios |
| --- |
| C. Participation probabilities based on the main effects logistic regression model are smaller |
| Equal covariate values |

ts221_tt1 ammattikoodi km_luokka_2018 rheuma_endpoints_pre_cont rheuma_endpoints_post_cont

1 QS only Unknown urban -Inf Inf

diabetes_pre_cont diabetes_post_cont cancer_h_post_cont birth_h_pre_cont birth_h_post_cont

1 -Inf Inf Inf -Inf Inf

kuntaryhma_koodi_2022 rr3 r3

1 Urban main effects smaller main effects smaller

| Differences in covariate values |
| --- |

n sukupuoli ika2 koul3 sose4 kieli3 siviilisaaty musculoskeletal_pre_cont

1 974 Mies 30 middle Working fi Unmarried -Inf

2 522 Mies 32 low Working other Married -Inf

3 674 Nainen 87 low Pensioners fi Widowed -1.367

musculoskeletal_post_cont arthropathies_pre_cont arthropathies_post_cont cancer_h_pre_cont

1 Inf -Inf Inf -Inf

2 Inf -Inf Inf -Inf

3 1.331337 -5.47 1.331337 -7.064

cvd_h_pre_cont cvd_h_post_cont mental_h_pre_cont mental_h_post_cont infection_h_pre_cont

1 -Inf Inf -0.114 0.03912845 -Inf

2 -Inf Inf -Inf Inf -Inf

3 -0.325 1.241566 -Inf Inf -2.687

infection_h_post_cont injury_h_pre_cont injury_h_post_cont ikalk hyvinvointialue_nimi_2022_fi

1 Inf -Inf Inf 25-34 Central Ostrobothnia WSC

2 Inf -Inf Inf 25-34 Vantaa and Kerava WSC

3 0.3390847 -1.797 0.5784223 85-94 Kymenlaakso WSC

ss2 kieliryhma2 pr.logit pr.rf rd rr

1 Married fi 0.149 0.242 0.093 1.620082

2 Not married other 0.091 0.168 0.077 1.847962

3 Married fi 0.254 0.395 0.141 1.555974

| D. Participation probabilities based on the main effects logistic regression model are larger |
| --- |
| Equal covariate values |

ts221_tt1 km_luokka_2018 kieli3 cancer_h_pre_cont cancer_h_post_cont birth_h_pre_cont

1 QS only urban fi -Inf Inf -Inf

birth_h_post_cont injury_h_post_cont kieliryhma2 kuntaryhma_koodi_2022 rr3

1 Inf Inf fi Urban main effects larger

r3

1 main effects larger

| Differences in covariate values |
| --- |

n sukupuoli ika2 ammattikoodi koul3 sose4 siviilisaaty musculoskeletal_pre_cont

1 671 Mies 75 Unknown middle Pensioners Married -5.534

2 381 Nainen 21 Service and sales workers middle Working Unmarried -7.642

3 803 Nainen 76 Unknown low Pensioners Widowed -Inf

musculoskeletal_post_cont arthropathies_pre_cont arthropathies_post_cont rheuma_endpoints_pre_cont

1 0.8254658 -5.534 0.8254658 -5.534

2 0.4012415 -7.642 0.4012415 -Inf

3 Inf -Inf Inf -Inf

rheuma_endpoints_post_cont diabetes_pre_cont diabetes_post_cont cvd_h_pre_cont cvd_h_post_cont

1 0.8254658 -0.181 0.09582478 -0.054 0.03361853

2 Inf -Inf Inf -Inf Inf

3 Inf -0.085 0.08487337 -0.184 0.56650696

mental_h_pre_cont mental_h_post_cont infection_h_pre_cont infection_h_post_cont injury_h_pre_cont

1 -Inf 0.823 -5.681 0.1657407 -18.341

2 -Inf 0.418 -1.379 0.8001198 -6.363

3 -0.184 0.567 -Inf Inf -Inf

ikalk hyvinvointialue_nimi_2022_fi ss2 pr.logit pr.rf rd rr

1 75-84 Vantaa and Kerava WSC Not married 0.684 0.392 -0.293 0.572

2 20-24 South Karelia WSC Married 0.380 0.256 -0.124 0.674

3 75-84 City of Helsinki Married 0.501 0.338 -0.163 0.674

Participation varied more among men than among women, with the highest participation observed at around age 70 for both sexes (Supplementary Figure 2). For other risk factors, participation was highest among Finnish speakers; married individuals and widows; profession; those with high education; students; and residents of rural areas.


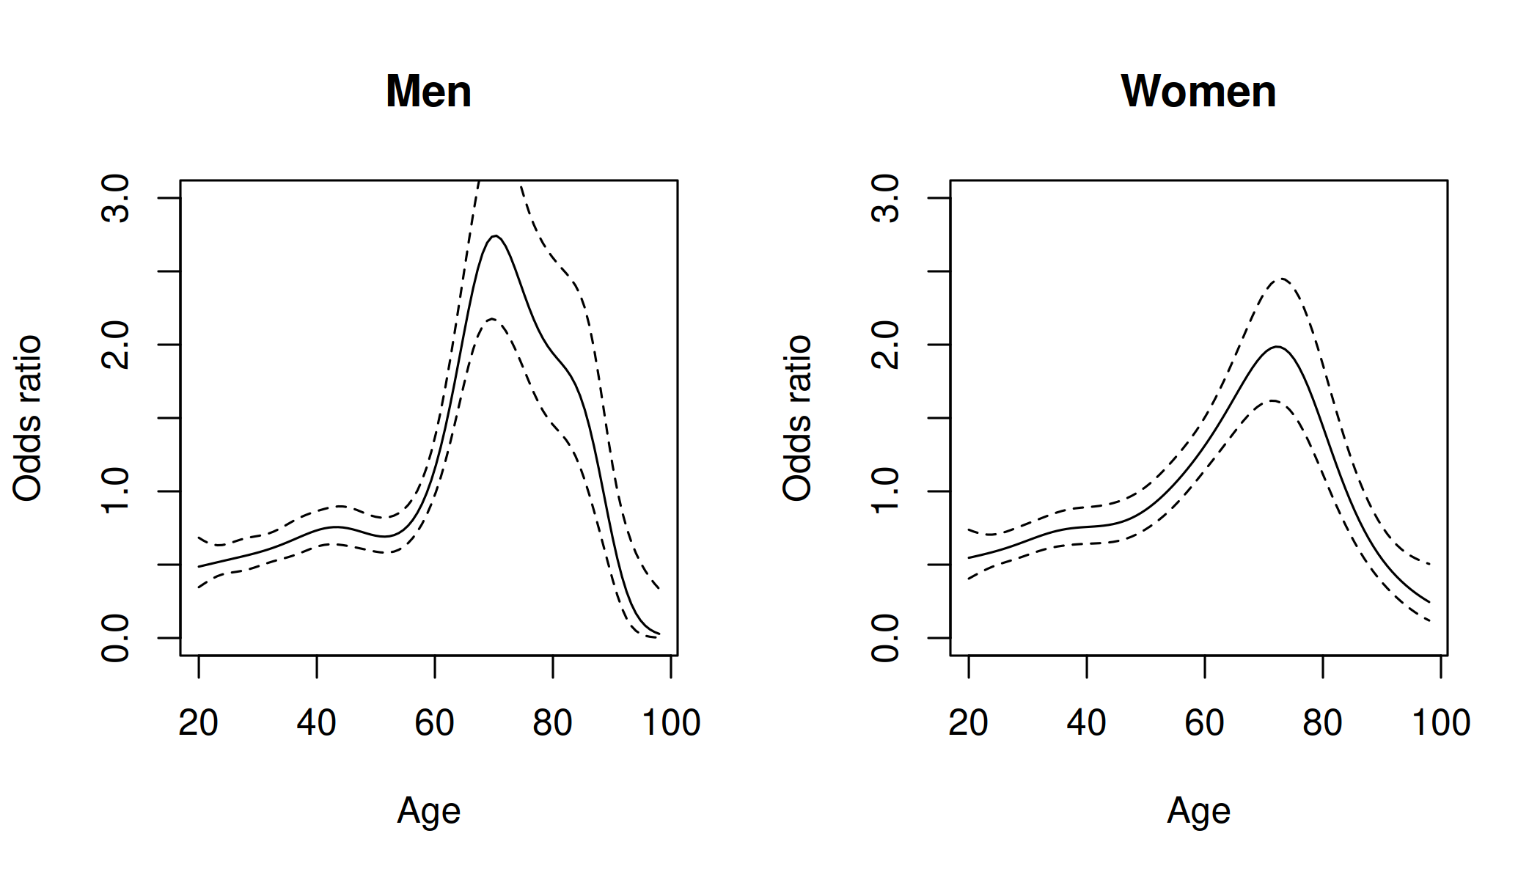


Supplementary Figure 2 Odds ratio estimates for age in the GAM model.

The OR estimates based on the HES participation (Supplementary Table 5) were similar to QS OR estimates (Supplementary Table 6). Higher HES participation rates were found among individuals, who were women, Finnish or Swedish speaking, married or widowed, had high education, were students or had had no hospitalization events in the past. Low participation rates were among working individuals, who were craft and related trades workers, had unknown working status, or lived in sparsely populated rural areas in municipalities, which were categorized as urban or densely populated rural municipalities.

Supplementary Table 5 Odds ratio estimates for the HES participation model (D2). Adjusted participation rates were based on adjustment for age and sex.

|  |  |  |  | Observed | | Adjusted | Odds Ratio | | |
| --- | --- | --- | --- | --- | --- | --- | --- | --- | --- |
|  |  |  |  | n | Participation (%) | | OR | 95% CI | |
| (Intercept) |  |  |  | 9,973 | 67.6 |  | 0.22 | 0.14 | 0.35 |
| Sex | Men |  |  | 4,871 | 63.5 | 63.6 | 1 |  |  |
|  | Women |  |  | 5,102 | 71.6 | 71.5 | 1.70 | 1.33 | 2.18 |
| Age |  |  |  | 9,973 | 67.6 |  |  |  |  |
|  | 23 |  |  |  |  | 50.1 | 1 |  |  |
|  | 36 |  |  |  |  | 63.1 | 1.52 | 1.19 | 1.94 |
|  | 53 |  |  |  |  | 67.5 | 1.60 | 1.26 | 2.02 |
|  | 68 |  |  |  |  | 82.2 | 5.18 | 3.80 | 7.05 |
|  | 83 |  |  |  |  | 67.3 | 3.29 | 2.25 | 4.81 |
| Language | fi |  |  | 8,855 | 69.4 | 69.1 | 1 |  |  |
|  | sv |  |  | 475 | 66.7 | 67.3 | 0.85 | 0.69 | 1.06 |
|  | other |  |  | 643 | 44.6 | 49.0 | 0.48 | 0.39 | 0.59 |
| Marital status | Married |  |  | 4,365 | 75.3 | 72.6 | 1 |  |  |
|  | Unmarried |  |  | 3,411 | 59.4 | 64.9 | 0.70 | 0.62 | 0.79 |
|  | Divorced |  |  | 1,341 | 66.7 | 61.9 | 0.66 | 0.57 | 0.76 |
|  | Widowed |  |  | 647 | 70.9 | 69.5 | 1.01 | 0.80 | 1.28 |
|  |  |  |  | 209 | 38.8 |  |  |  |  |
| Profession | Unknown |  |  | 4,996 | 66.6 | 61.7 | 1 |  |  |
|  | Managers |  |  | 194 | 75.3 | 77.5 | 1.98 | 1.26 | 3.11 |
|  | Professionals |  |  | 1,121 | 78.5 | 81.0 | 2.22 | 1.59 | 3.10 |
|  | Technicians and associate professionals | | | 969 | 76.9 | 79.2 | 2.22 | 1.59 | 3.09 |
|  | Clerical support workers | | | 300 | 72.7 | 74.7 | 1.97 | 1.33 | 2.92 |
|  | Service and sales workers |  |  | 1,066 | 63.3 | 66.9 | 1.56 | 1.14 | 2.15 |
|  | Skilled agricultural, forestry and fishery workers | | | 103 | 76.7 | 79.2 | 3.07 | 1.74 | 5.39 |
|  | Craft and related trades workers | | | 497 | 51.7 | 61.0 | 1.27 | 0.90 | 1.80 |
|  | Plant and machine operators, and assemblers | | | 387 | 58.4 | 64.7 | 1.50 | 1.04 | 2.15 |
|  | Elementary occupations |  |  | 340 | 56.8 | 62.7 | 1.62 | 1.12 | 2.35 |
| Education | low |  |  | 2,092 | 54.2 | 51.3 | 1 |  |  |
|  | middle |  |  | 4,441 | 64.9 | 66.5 | 1.77 | 1.56 | 2.01 |
|  | high |  |  | 3,440 | 79.3 | 78.8 | 2.72 | 2.34 | 3.16 |
| Socio-economic | Working |  |  | 5,204 | 67.6 | 71.9 | 1 |  |  |
|  | Other or unknown |  |  | 1,039 | 54.3 | 61.1 | 1.38 | 1.01 | 1.90 |
|  | Pensioners |  |  | 3,170 | 73.7 | 59.3 | 1.30 | 0.91 | 1.85 |
|  | Students |  |  | 560 | 58.0 | 73.0 | 2.09 | 1.47 | 2.96 |
| kuntalk | Urban |  |  | 7,061 | 67.2 | 68.2 | 1 |  |  |
|  | Dense rural |  |  | 1,318 | 67.9 | 65.8 | 0.96 | 0.80 | 1.14 |
|  | Sparse rural |  |  | 1,594 | 69.2 | 66.6 | 1.10 | 0.90 | 1.34 |
| Urban-rural (sq) | urban |  |  | 7,527 | 67.7 | 68.5 | 1 |  |  |
|  | dense rural |  |  | 1,104 | 67.3 | 65.2 | 0.91 | 0.76 | 1.10 |
|  | sparse rural |  |  | 1,342 | 67.3 | 64.7 | 0.78 | 0.63 | 0.96 |
| CVD pre |  |  |  | 9,973 | 67.6 |  | 1 | 0.99 | 1.01 |
|  | -27 |  |  |  |  | 67.7 |  |  |  |
|  | -25.99 |  |  |  |  | 67.7 |  |  |  |
|  | -0.5826 |  |  |  |  | 67.4 |  |  |  |
| Mental pre |  |  |  | 9,973 | 67.6 |  | 0.98 | 0.98 | 0.99 |
|  | -27 |  |  |  |  | 69.2 |  |  |  |
|  | -0.5811 |  |  |  |  | 57.0 |  |  |  |
| Infections pre |  |  |  | 9,973 | 67.6 |  | 1 | 0.99 | 1.01 |
|  | -27 |  |  |  |  | 67.9 |  |  |  |
|  | -26.09 |  |  |  |  | 67.8 |  |  |  |
|  | -0.5817 |  |  |  |  | 66.4 |  |  |  |
| Birth-related pre |  |  |  | 9,973 | 67.6 |  | 0.99 | 0.98 | 1.00 |
|  | -27 |  |  |  |  | 67.7 |  |  |  |
|  | -0.5852 |  |  |  |  | 67.3 |  |  |  |
| Injuries pre |  |  |  | 9,973 | 67.6 |  | 1 | 1.00 | 1.00 |
|  | -27 |  |  |  |  | 68.1 |  |  |  |
|  | -9.443 |  |  |  |  | 67.1 |  |  |  |
|  | -0.5808 |  |  |  |  | 66.6 |  |  |  |
| Sex | Men | **Age** |  | 4,871 | 63.5 |  |  |  |  |
|  | Women |  |  | 5,102 | 71.6 |  |  |  |  |
|  | Men |  | 23 |  |  | 45.2 | 1 |  |  |
|  |  |  | 36 |  |  | 58.5 | 1 |  |  |
|  |  |  | 53 |  |  | 63.2 | 1 |  |  |
|  |  |  | 68 |  |  | 79.4 | 1 |  |  |
|  |  |  | 83 |  |  | 63.0 | 1 |  |  |
|  | Women |  | 23 |  |  | 54.8 | 1 |  |  |
|  |  |  | 36 |  |  | 67.4 | 0.84 | 0.60 | 1.17 |
|  |  |  | 53 |  |  | 71.6 | 0.87 | 0.65 | 1.18 |
|  |  |  | 68 |  |  | 85.0 | 0.74 | 0.53 | 1.02 |
|  |  |  | 83 |  |  | 71.4 | 0.59 | 0.41 | 0.83 |

Supplementary Table 6 Number of observations, and crude and adjusted (age and sex) participation rates in the QS (D1) within the categories of the predictors. The estimated odds ratios of the fully adjusted logistic regression model with 95% confidence intervals.

|  |  |  |  | Descriptive statistics | | Adjusted | Odds ratios | | |
| --- | --- | --- | --- | --- | --- | --- | --- | --- | --- |
|  |  |  |  | **n** | **Participation (%)** | | **OR** | **95% CI** | |
| (Intercept) |  |  |  | 61,600 | 45.7 |  | 0.14 | 0.12 | 0.16 |
| Age | 20-24 |  |  | 3,256 | 26.1 | 26.4 | 1 |  |  |
|  | 25-34 |  |  | 7,580 | 28.2 | 28.4 | 0.88 | 0.75 | 1.03 |
|  | 35-44 |  |  | 7,945 | 31.9 | 32.2 | 1.03 | 0.88 | 1.2 |
|  | 45-54 |  |  | 7,692 | 37.8 | 38.0 | 1.35 | 1.16 | 1.57 |
|  | 55-64 |  |  | 8,857 | 51.4 | 51.6 | 2.76 | 2.37 | 3.2 |
|  | 65-74 |  |  | 8,670 | 63.3 | 63.3 | 5.22 | 4.48 | 6.07 |
|  | 75-84 |  |  | 12,992 | 61.1 | 60.8 | 6.09 | 5.25 | 7.06 |
|  | 85-94 |  |  | 4,329 | 38.7 | 37.7 | 3.24 | 2.72 | 3.85 |
|  | 95+ |  |  | 279 | 26.9 | 25.2 | 2.23 | 1.2 | 4.15 |
| Sex | Men |  |  | 29,625 | 41.6 | 42.1 | 1 |  |  |
|  | Women |  |  | 31,975 | 49.5 | 49.1 | 2.06 | 1.75 | 2.43 |
| WSC | City of Helsinki |  |  | 2,800 | 50.7 | 53.1 | 1 |  |  |
|  | East Uusimaa |  |  | 2,800 | 43.6 | 43.1 | 0.92 | 0.81 | 1.03 |
|  | Central Uusimaa |  |  | 2,800 | 45.0 | 45.3 | 1.02 | 0.91 | 1.15 |
|  | West Uusimaa |  |  | 2,800 | 47.8 | 49.0 | 0.97 | 0.86 | 1.09 |
|  | Vantaa and Kerava |  |  | 2,800 | 44.2 | 46.3 | 1.02 | 0.91 | 1.15 |
|  | Southwest Finland |  |  | 2,800 | 47.7 | 47.8 | 0.99 | 0.88 | 1.11 |
|  | Satakunta |  |  | 2,800 | 44.9 | 44.2 | 0.92 | 0.82 | 1.03 |
|  | Kanta-Häme |  |  | 2,800 | 47.5 | 46.7 | 0.99 | 0.89 | 1.12 |
|  | Pirkanmaa |  |  | 2,800 | 50.5 | 51.6 | 1.18 | 1.05 | 1.33 |
|  | Päijät-Häme |  |  | 2,800 | 45.9 | 45.3 | 0.99 | 0.89 | 1.12 |
|  | Kymenlaakso |  |  | 2,800 | 41.7 | 40.5 | 0.78 | 0.69 | 0.88 |
|  | South Karelia |  |  | 2,800 | 49.3 | 48.5 | 1.11 | 0.99 | 1.25 |
|  | South Savo |  |  | 2,800 | 45.3 | 43.7 | 0.96 | 0.86 | 1.08 |
|  | North Savo |  |  | 2,800 | 48.5 | 48.3 | 1.05 | 0.94 | 1.18 |
|  | North Karelia |  |  | 2,800 | 46.1 | 45.6 | 1 | 0.89 | 1.12 |
|  | Central Finland |  |  | 2,800 | 47.5 | 47.7 | 1.04 | 0.92 | 1.16 |
|  | South Ostrobothnia |  |  | 2,800 | 40.7 | 40.0 | 0.77 | 0.68 | 0.87 |
|  | Ostrobothnia |  |  | 2,800 | 41.0 | 42.2 | 0.83 | 0.73 | 0.94 |
|  | Central Ostrobothnia |  |  | 2,800 | 42.9 | 43.0 | 0.89 | 0.79 | 1 |
|  | North Ostrobothnia |  |  | 2,800 | 47.5 | 48.4 | 1 | 0.89 | 1.12 |
|  | Kainuu |  |  | 2,800 | 43.8 | 42.5 | 0.94 | 0.83 | 1.06 |
|  | Lapland |  |  | 2,800 | 43.6 | 42.8 | 0.89 | 0.79 | 1 |
| Marriage | Not married |  |  | 33,566 | 39.2 | 41.3 | 1 |  |  |
|  | Married |  |  | 28,034 | 53.5 | 50.8 | 1.59 | 1.51 | 1.68 |
| Language | fi |  |  | 55,454 | 46.8 | 46.4 | 1 |  |  |
|  | sv |  |  | 3,504 | 45.5 | 45.1 | 0.98 | 0.9 | 1.07 |
|  | other |  |  | 2,642 | 23.8 | 30.9 | 0.51 | 0.46 | 0.56 |
| Education | low |  |  | 15,919 | 38.7 | 33.4 | 1 |  |  |
|  | middle |  |  | 26,184 | 41.4 | 43.9 | 1.58 | 1.51 | 1.66 |
|  | high |  |  | 19,497 | 57.2 | 58.5 | 2.84 | 2.7 | 2.99 |
| Urban-rural | Urban |  |  | 41,160 | 46.0 | 47.0 | 1 |  |  |
|  | Dense rural |  |  | 9,810 | 43.8 | 42.6 | 0.92 | 0.87 | 0.96 |
|  | Sparse rural |  |  | 10,630 | 46.3 | 43.8 | 1.01 | 0.96 | 1.06 |
| Sample | QS only |  |  | 53,213 | 44.1 | 43.7 | 1 |  |  |
|  | HES |  |  | 8,387 | 55.8 | 58.6 | 2.1 | 1.73 | 2.54 |
| Age | 20-24 | **Sex** | Men | 1,716 | 18.8 | 23.3 | 1 |  |  |
|  | 20-24 |  | Women | 1,540 | 34.3 | 29.2 | 1 |  |  |
|  | 25-34 |  | Men | 3,919 | 21.2 | 25.2 | 1 |  |  |
|  | 25-34 |  | Women | 3,661 | 35.7 | 31.4 | 0.93 | 0.77 | 1.13 |
|  | 35-44 |  | Men | 4,148 | 26.8 | 28.7 | 1 |  |  |
|  | 35-44 |  | Women | 3,797 | 37.5 | 35.3 | 0.79 | 0.65 | 0.96 |
|  | 45-54 |  | Men | 3,920 | 32.3 | 34.3 | 1 |  |  |
|  | 45-54 |  | Women | 3,772 | 43.4 | 41.4 | 0.78 | 0.64 | 0.94 |
|  | 55-64 |  | Men | 4,466 | 46.6 | 47.6 | 1 |  |  |
|  | 55-64 |  | Women | 4,391 | 56.3 | 55.2 | 0.73 | 0.61 | 0.89 |
|  | 65-74 |  | Men | 4,099 | 60.1 | 59.6 | 1 |  |  |
|  | 65-74 |  | Women | 4,571 | 66.2 | 66.7 | 0.72 | 0.59 | 0.87 |
|  | 75-84 |  | Men | 5,818 | 61.9 | 57.1 | 1 |  |  |
|  | 75-84 |  | Women | 7,174 | 60.4 | 64.3 | 0.57 | 0.48 | 0.69 |
|  | 85-94 |  | Men | 1,486 | 42.9 | 34.0 | 1 |  |  |
|  | 85-94 |  | Women | 2,843 | 36.5 | 41.1 | 0.49 | 0.4 | 0.61 |
|  | 95+ |  | Men | 53 | 30.2 | 22.2 | 1 |  |  |
|  | 95+ |  | Women | 226 | 26.1 | 28.0 | 0.46 | 0.23 | 0.92 |
| Sex | Men | **Marriage** | Not married | 15,288 | 31.8 | 37.4 | 1 |  |  |
|  | Men |  | Married | 14,337 | 52.1 | 46.8 | 1 |  |  |
|  | Women |  | Not married | 18,278 | 45.4 | 44.9 | 1 |  |  |
|  | Women |  | Married | 13,697 | 55.0 | 54.5 | 0.8 | 0.74 | 0.86 |
| Age | 20-24 | **Sample** | QS only | 2,636 | 23.0 | 23.7 | 1 |  |  |
|  | 20-24 |  | HES | 620 | 39.2 | 37.6 | 1 |  |  |
|  | 25-34 |  | QS only | 6,189 | 24.4 | 25.8 | 1 |  |  |
|  | 25-34 |  | HES | 1,391 | 45.1 | 40.2 | 1.24 | 0.98 | 1.55 |
|  | 35-44 |  | QS only | 6,626 | 28.1 | 29.6 | 1 |  |  |
|  | 35-44 |  | HES | 1,319 | 50.9 | 44.9 | 1.34 | 1.07 | 1.68 |
|  | 45-54 |  | QS only | 6,521 | 34.6 | 35.5 | 1 |  |  |
|  | 45-54 |  | HES | 1,171 | 55.2 | 51.6 | 1.13 | 0.9 | 1.42 |
|  | 55-64 |  | QS only | 7,530 | 49.3 | 49.2 | 1 |  |  |
|  | 55-64 |  | HES | 1,327 | 63.5 | 65.2 | 0.84 | 0.67 | 1.05 |
|  | 65-74 |  | QS only | 7,415 | 62.2 | 61.2 | 1 |  |  |
|  | 65-74 |  | HES | 1,255 | 70.4 | 75.4 | 0.66 | 0.52 | 0.83 |
|  | 75-84 |  | QS only | 12,030 | 60.6 | 59.8 | 1 |  |  |
|  | 75-84 |  | HES | 962 | 66.6 | 74.2 | 0.6 | 0.47 | 0.76 |
|  | 85-94 |  | QS only | 4,007 | 38.7 | 36.5 | 1 |  |  |
|  | 85-94 |  | HES | 322 | 38.2 | 52.7 | 0.45 | 0.33 | 0.62 |
|  | 95+ |  | QS only | 259 | 26.3 | 24.2 | 1 |  |  |
|  | 95+ |  | HES | 20 | 35.0 | 38.2 | 0.66 | 0.24 | 1.8 |
